# Supplementary material
Source: Royal Society of Chemistry journal article supplement (doi:10.1039/d6ma00275g)
Supplement: d6ma00275g1.pdf [file d6ma00275g1.pdf]

1 *Materials Advances*

2 Supplementary Information for

3 **Influence of pressure-induced structural change in**  
4 **Al<sub>2</sub>O<sub>3</sub>–SiO<sub>2</sub> glasses on the sound velocity and**  
5 **Poisson's ratio under pressure**

6 *Itaru Ohira,<sup>\*a</sup> Yoshio Kono,<sup>b</sup> Steeve Gréaux,<sup>c</sup> Sayako Inoué,<sup>c</sup> Nozomi M. Kondo,<sup>d</sup> Sho Kakizawa,<sup>e</sup>*  
7 *Yuji Higo,<sup>e</sup> Noriyoshi Tsujino,<sup>e</sup> Rostislav Hrubíak,<sup>f</sup> Guoyin Shen<sup>f</sup> and Atsunobu Masuno<sup>g</sup>*

8 <sup>a</sup>Department of Chemistry, Gakushuin University, Japan.

9 <sup>b</sup>Department of Physics and Astronomy, Kwansei Gakuin University, Japan.

10 <sup>c</sup>Geodynamics Research Center, PIAS, Ehime University, Japan.

11 <sup>d</sup>Institute for Planetary Materials, Okayama University, Japan.

12 <sup>e</sup>Japan Synchrotron Radiation Research Institute, Japan.

13 <sup>f</sup>High Pressure Collaborative Access Team, X-ray Science Division, Argonne National Laboratory,  
14 USA.

15 <sup>g</sup>Graduate School of Engineering, Kyoto University, Japan.

16

17 **Contents of this file**

18 ➤ Figures S1 to S5

19 ➤ Tables S1 to S7

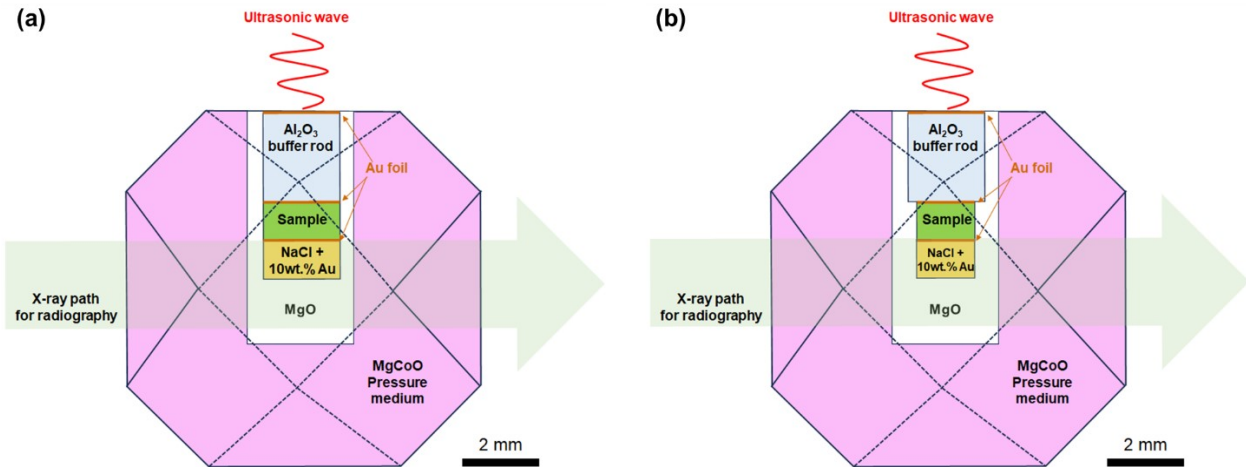

20

21 **Figure S1.** Schematic diagram of the high-pressure cell used in the present ultrasonic experiments.

22 The cell (a) was used for the 29AS, 36AS, 43AS glass samples (initial diameter of sample glass:

23 ~2 mm), while the cell (b) was used for the 50AS and 60AS glasses (initial diameter of sample

24 glass: ~1.5 mm).

25

26

27

28

29

30

31

32

33

34

35

36

37

38

39

40

41

42

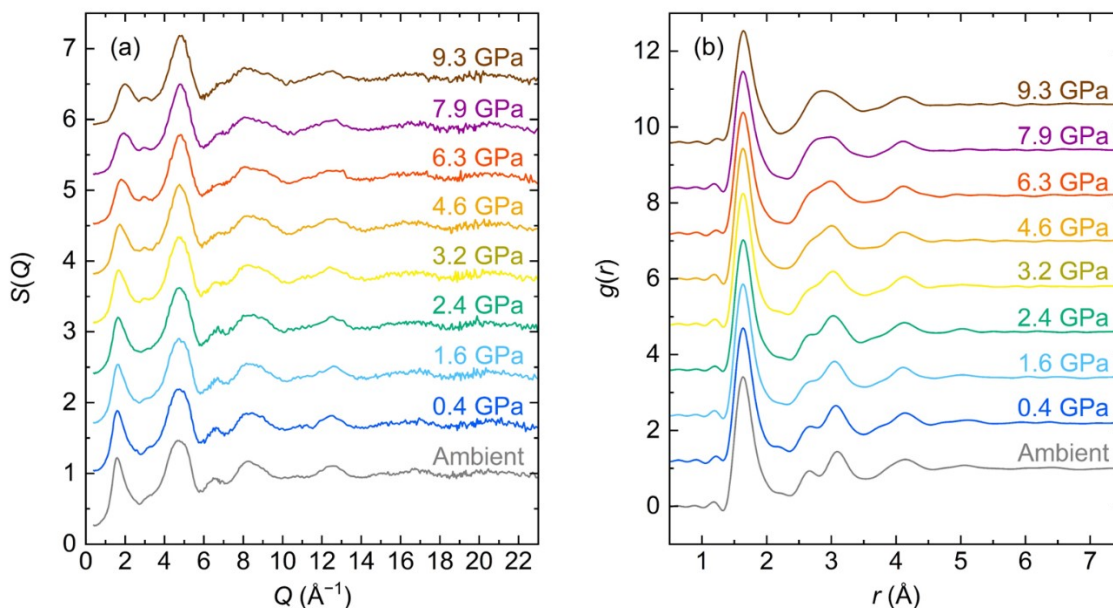

43

44 **Figure S2.** (a) Structure factor [ $S(Q)$ ] and (b) pair distribution function [ $g(r)$ ] of the 29AS glass  
 45 obtained by the high-pressure *in situ* ADXD measurements at BL15XU, SPring-8. The  $S(Q)$  and  
 46  $g(r)$  are displayed by vertical offsets of 0.7 and 1.2, respectively.

47

48

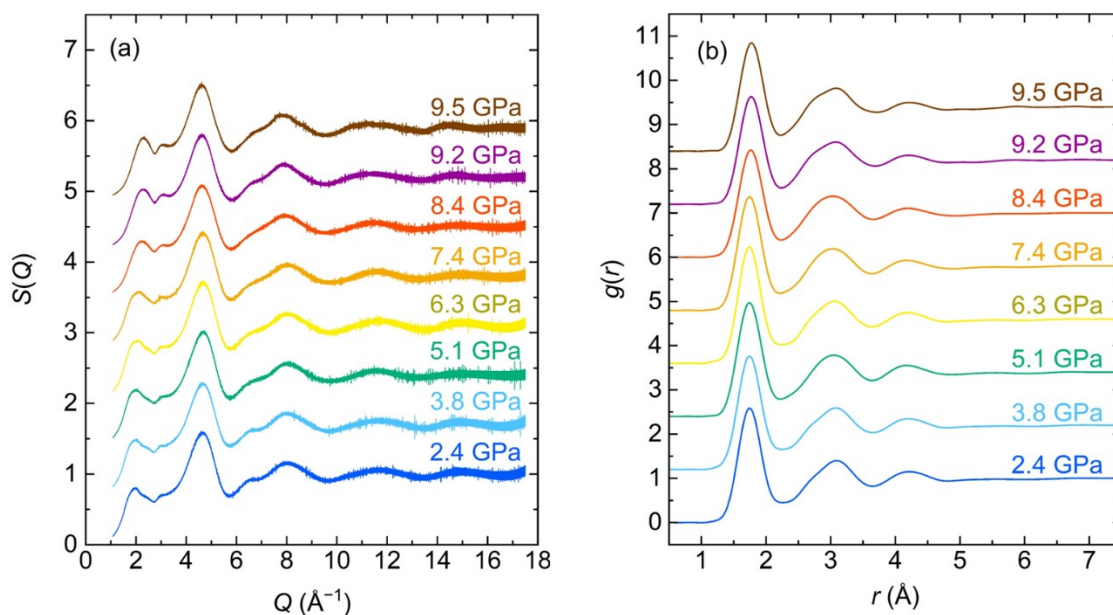

49

50 **Figure S3.** (a) Structure factor [ $S(Q)$ ] and (b) pair distribution function [ $g(r)$ ] of the 60 AS glass  
 51 up to 9.5 GPa obtained by the high-pressure *in situ* EDXD measurements at 16-BM-B, APS. The  
 52  $S(Q)$  and  $g(r)$  profiles are displayed by vertical offsets of 0.7 and 1.2, respectively.

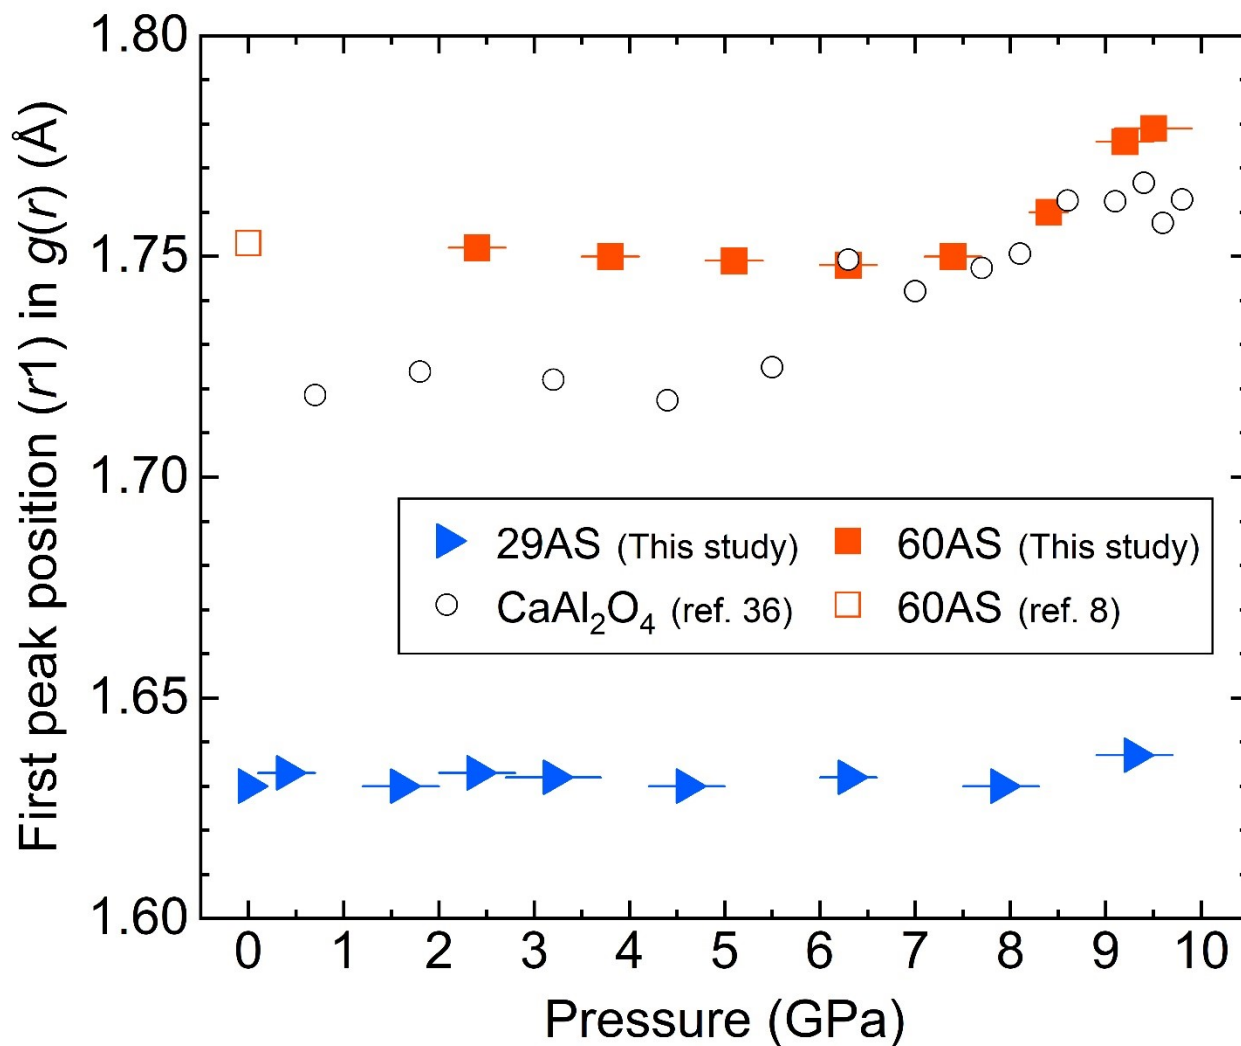

53

54 **Figure S4.** The first peak position ( $r_1$ ) in the  $g(r)$  of the 29AS, 60AS, and CaAl<sub>2</sub>O<sub>4</sub><sup>36</sup> glasses at  
 55 high pressures. The  $r_1$  was determined from fitting a Gaussian function to the data after subtracting  
 56 the background using a constant line or a linear function. The fitting ranges are 1.35–1.95 Å for  
 57 the 29AS glass and 1.35–2.05 Å for the 60AS glass, respectively. Only the  $r_1$  of the unpressurised  
 58 60AS glass (open square) was measured without a high-pressure cell.<sup>8</sup>

59

60

61

62

63

64

65

66  
67

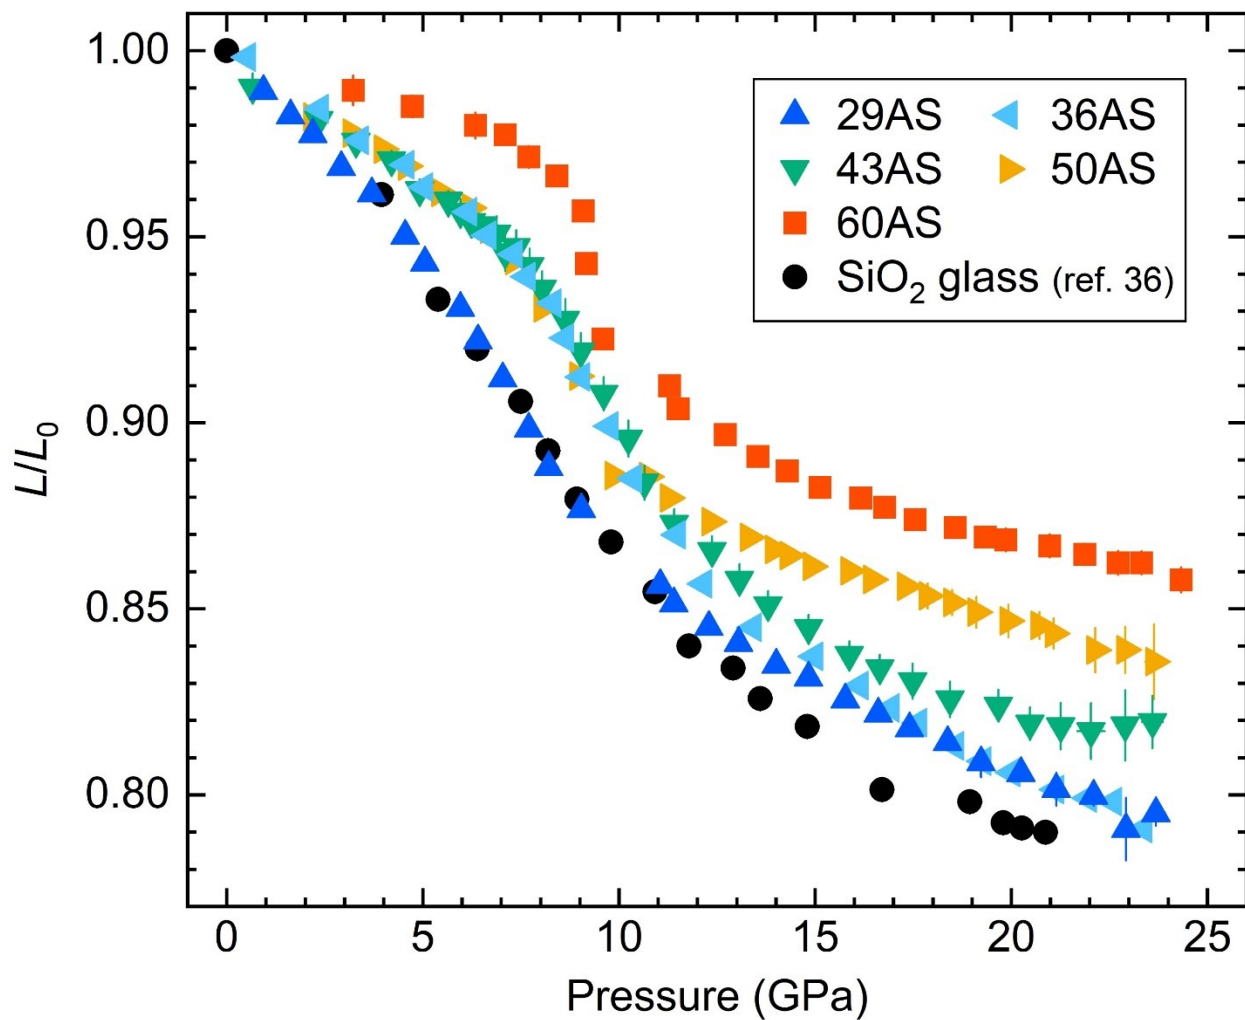

68  
69  
70  
71  
72  
73  
74  
75  
76  
77  
78

**Figure S5.** Normalized sample length ( $L/L_0$ ) of the AS glasses (this study) and SiO<sub>2</sub>.<sup>36</sup>

**Table S1.** Sample length ( $L$ ),  $v_L$ ,  $v_T$ , and Poisson's ratio ( $\sigma$ ) of the 29AS glass.

| $P$ (GPa) | $L$ (mm) | $v_L$ (km/s) | $v_T$ (km/s) | $\sigma$  |
|-----------|----------|--------------|--------------|-----------|
| 0.94(3)   | 0.989(1) | 6.479(8)     | 3.874(5)     | 0.222(3)  |
| 1.63(8)   | 0.983(1) | 6.335(9)     | 3.81(4)      | 0.217(3)  |
| 2.20(9)   | 0.978(1) | 6.212(6)     | 3.755(3)     | 0.212(2)  |
| 2.92(9)   | 0.969(1) | 6.024(6)     | 3.659(5)     | 0.208(3)  |
| 3.70(12)  | 0.962(1) | 5.877(18)    | 3.580(5)     | 0.205(7)  |
| 4.55(6)   | 0.95(1)  | 5.779(5)     | 3.508(4)     | 0.208(3)  |
| 5.05(4)   | 0.943(1) | 5.792(6)     | 3.491(4)     | 0.215(3)  |
| 5.96(4)   | 0.931(1) | 5.881(16)    | 3.498(5)     | 0.226(6)  |
| 5.96(4)   | 0.931(1) | 5.900(17)    | 3.507(5)     | 0.227(7)  |
| 6.41(8)   | 0.922(1) | 6.027(9)     | 3.539(5)     | 0.237(4)  |
| 7.04(9)   | 0.912(1) | 6.212(7)     | 3.591(4)     | 0.249(3)  |
| 7.70(10)  | 0.898(1) | 6.409(7)     | 3.651(5)     | 0.260(3)  |
| 8.21(12)  | 0.888(1) | 6.600(9)     | 3.714(5)     | 0.268(4)  |
| 9.04(12)  | 0.877(1) | 6.843(10)    | 3.810(11)    | 0.275(5)  |
| 11.05(8)  | 0.856(1) | 7.229(14)    | 3.947(12)    | 0.288(5)  |
| 11.40(11) | 0.851(2) | 7.337(17)    | 3.990(16)    | 0.290(7)  |
| 12.29(6)  | 0.845(2) | 7.509(17)    | 4.062(13)    | 0.293(6)  |
| 13.05(5)  | 0.841(2) | 7.578(17)    | 4.079(11)    | 0.296(6)  |
| 14.01(6)  | 0.835(1) | 7.693(11)    | 4.119(7)     | 0.299(4)  |
| 14.83(4)  | 0.831(1) | 7.808(13)    | 4.165(10)    | 0.301(4)  |
| 15.77(4)  | 0.826(2) | 7.936(18)    | 4.215(12)    | 0.304(6)  |
| 16.61(2)  | 0.822(1) | 8.033(15)    | 4.250(9)     | 0.306(5)  |
| 17.41(2)  | 0.818(2) | 8.156(18)    | 4.297(10)    | 0.308(6)  |
| 18.38(2)  | 0.814(1) | 8.269(18)    | 4.339(10)    | 0.310(6)  |
| 19.23(4)  | 0.809(4) | 8.361(43)    | 4.373(22)    | 0.312(13) |
| 20.25(10) | 0.806(2) | 8.507(22)    | 4.437(14)    | 0.313(7)  |
| 21.15(15) | 0.802(4) | 8.614(48)    | 4.480(28)    | 0.315(14) |
| 22.10(10) | 0.800(3) | 8.730(29)    | 4.533(20)    | 0.315(9)  |
| 22.92(16) | 0.791(8) | 8.760(93)    | 4.540(49)    | 0.316(26) |
| 23.69(17) | 0.795(3) | 8.958(38)    | 4.640(27)    | 0.317(11) |

80 \*The numbers in parentheses indicate the uncertainties for the last digit. The initial thickness ( $L_0$ )  
81 is 1.00 mm, and the  $v_L$  and  $v_T$  at ambient conditions are 6.85 and 4.00 km/s, estimated from the  
82 previous measurement.<sup>3</sup>

**Table S2.** Sample length ( $L$ ),  $v_L$ ,  $v_T$ , and Poisson's ratio ( $\sigma$ ) of the 36AS glass.

| $P$ (GPa) | $L$ (mm) | $v_L$ (km/s) | $v_T$ (km/s) | $\sigma$  |
|-----------|----------|--------------|--------------|-----------|
| 0.52(3)   | 1.123(1) |              |              |           |
| 2.38(5)   | 1.107(1) | 6.547(11)    | 3.859(9)     | 0.234(5)  |
| 3.40(7)   | 1.098(1) | 6.368(11)    | 3.774(2)     | 0.229(4)  |
| 4.56(9)   | 1.091(1) | 6.234(5)     | 3.705(2)     | 0.227(2)  |
| 5.04(6)   | 1.084(1) | 6.149(4)     | 3.655(2)     | 0.227(1)  |
| 6.16(4)   | 1.076(1) | 6.112(4)     | 3.617(2)     | 0.230(1)  |
| 6.65(6)   | 1.069(1) | 6.106(3)     | 3.603(2)     | 0.233(1)  |
| 7.32(4)   | 1.063(1) | 6.142(4)     | 3.605(3)     | 0.237(2)  |
| 7.65(9)   | 1.057(1) | 6.192(3)     | 3.615(2)     | 0.241(1)  |
| 8.31(6)   | 1.049(1) | 6.276(7)     | 3.636(3)     | 0.247(3)  |
| 8.63(6)   | 1.038(1) | 6.389(11)    | 3.670(4)     | 0.254(4)  |
| 9.04(4)   | 1.026(1) | 6.556(14)    | 3.728(4)     | 0.261(5)  |
| 9.76(2)   | 1.012(1) | 6.777(28)    | 3.809(5)     | 0.269(10) |
| 10.36(4)  | 0.996(1) | 6.984(29)    | 3.891(8)     | 0.275(10) |
| 11.48(3)  | 0.979(1) | 7.256(41)    | 3.997(7)     | 0.282(13) |
| 12.15(4)  | 0.964(1) | 7.462(33)    | 4.081(3)     | 0.287(10) |
| 13.42(6)  | 0.951(1) | 7.68(43)     | 4.158(9)     | 0.293(13) |
| 14.98(2)  | 0.942(1) | 7.859(41)    | 4.225(10)    | 0.297(12) |
| 16.14(3)  | 0.933(1) | 8.040(38)    | 4.293(9)     | 0.301(11) |
| 16.93(4)  | 0.926(1) | 8.120(41)    | 4.312(8)     | 0.304(11) |
| 17.63(2)  | 0.922(1) | 8.247(28)    | 4.365(6)     | 0.305(8)  |
| 18.57(2)  | 0.915(1) | 8.369(33)    | 4.407(6)     | 0.308(9)  |
| 19.27(6)  | 0.910(2) | 8.458(31)    | 4.438(8)     | 0.310(8)  |
| 20.01(10) | 0.907(2) | 8.550(26)    | 4.470(11)    | 0.312(7)  |
| 21.13(10) | 0.902(2) | 8.677(27)    | 4.513(9)     | 0.315(7)  |
| 21.96(15) | 0.899(2) | 8.752(33)    | 4.536(12)    | 0.316(9)  |
| 22.60(9)  | 0.898(2) | 8.862(34)    | 4.580(12)    | 0.318(9)  |
| 23.37(14) | 0.890(3) | 8.910(36)    | 4.593(14)    | 0.319(9)  |

84 \*The numbers in parentheses indicate the uncertainties for the last digit. The initial thickness ( $L_0$ )  
85 is 1.13 mm, and the  $v_L$  and  $v_T$  at ambient conditions are 7.00 and 4.05 km/s, estimated from the  
86 previous measurement.<sup>3</sup>

**Table S3.** Sample length ( $L$ ),  $v_L$ ,  $v_T$ , and Poisson's ratio ( $\sigma$ ) of the 43AS glass.

| $P$ (GPa) | $L$ (mm) | $v_L$ (km/s) | $v_T$ (km/s) | $\sigma$  |
|-----------|----------|--------------|--------------|-----------|
| 0.66(3)   | 0.921(4) | 7.039(27)    | 4.047(16)    | 0.253(10) |
| 2.35(4)   | 0.913(3) | 6.836(23)    | 3.962(14)    | 0.247(9)  |
| 3.30(8)   | 0.907(2) | 6.706(17)    | 3.890(10)    | 0.246(7)  |
| 4.20(9)   | 0.903(2) | 6.621(17)    | 3.840(10)    | 0.246(7)  |
| 4.92(8)   | 0.895(3) | 6.533(20)    | 3.783(12)    | 0.248(8)  |
| 5.65(13)  | 0.893(2) | 6.511(18)    | 3.761(11)    | 0.250(7)  |
| 5.96(13)  | 0.890(3) | 6.492(24)    | 3.750(14)    | 0.250(9)  |
| 6.24(13)  | 0.887(3) | 6.487(21)    | 3.744(13)    | 0.250(9)  |
| 6.54(10)  | 0.886(3) | 6.495(21)    | 3.746(12)    | 0.251(8)  |
| 6.88(17)  | 0.884(4) | 6.502(32)    | 3.741(18)    | 0.253(13) |
| 7.10(16)  | 0.880(5) | 6.491(34)    | 3.731(20)    | 0.253(14) |
| 7.38(14)  | 0.881(4) | 6.537(32)    | 3.747(18)    | 0.255(13) |
| 7.73(14)  | 0.876(4) | 6.557(34)    | 3.748(19)    | 0.257(13) |
| 8.04(12)  | 0.870(4) | 6.607(34)    | 3.757(19)    | 0.261(13) |
| 8.63(11)  | 0.863(5) | 6.711(40)    | 3.789(23)    | 0.266(15) |
| 9.03(11)  | 0.855(5) | 6.818(37)    | 3.823(21)    | 0.271(14) |
| 9.61(5)   | 0.844(4) | 7.011(35)    | 3.893(20)    | 0.277(13) |
| 10.24(11) | 0.833(5) | 7.196(40)    | 3.960(22)    | 0.283(14) |
| 10.65(9)  | 0.822(4) | 7.37(39)     | 4.030(22)    | 0.287(13) |
| 11.41(7)  | 0.812(4) | 7.558(35)    | 4.106(20)    | 0.291(12) |
| 12.37(8)  | 0.805(4) | 7.722(36)    | 4.174(19)    | 0.294(11) |
| 13.07(9)  | 0.798(4) | 7.871(39)    | 4.232(21)    | 0.297(12) |
| 13.80(10) | 0.791(4) | 7.990(36)    | 4.278(20)    | 0.299(11) |
| 14.83(7)  | 0.786(3) | 8.140(35)    | 4.337(19)    | 0.302(11) |
| 15.87(10) | 0.779(3) | 8.248(36)    | 4.377(19)    | 0.304(11) |
| 16.65(11) | 0.776(3) | 8.383(37)    | 4.437(20)    | 0.305(11) |
| 17.49(16) | 0.772(4) | 8.502(49)    | 4.483(26)    | 0.308(14) |
| 18.44(13) | 0.768(4) | 8.684(51)    | 4.562(27)    | 0.309(14) |
| 19.67(22) | 0.766(4) | 8.784(46)    | 4.599(24)    | 0.311(13) |
| 20.48(20) | 0.762(4) | 8.841(48)    | 4.617(25)    | 0.313(13) |
| 21.26(25) | 0.761(6) | 8.95(69)     | 4.663(36)    | 0.314(19) |
| 22.03(35) | 0.760(7) | 9.044(84)    | 4.704(43)    | 0.315(23) |

|           |          |            |           |           |
|-----------|----------|------------|-----------|-----------|
| 22.90(24) | 0.761(9) | 9.181(106) | 4.769(55) | 0.315(28) |
| 23.60(27) | 0.762(7) | 9.288(80)  | 4.819(42) | 0.316(21) |

89 \*The numbers in parentheses indicate the uncertainties for the last digit. The initial thickness ( $L_0$ )  
90 is 0.93 mm, and the  $v_L$  and  $v_T$  at ambient conditions are 7.20 and 4.15 km/s, estimated from the  
91 previous measurement.<sup>3</sup>

92  
93  
94  
95  
96  
97  
98  
99  
100  
101  
102  
103  
104  
105  
106  
107  
108  
109  
110  
111  
112  
113  
114  
115  
116  
117

**Table S4.** Sample length ( $L$ ),  $v_L$ ,  $v_T$ , and Poisson's ratio ( $\sigma$ ) of the 50AS glass.

| $P$ (GPa) | $L$ (mm) | $v_L$ (km/s) | $v_T$ (km/s) | $\sigma$  |
|-----------|----------|--------------|--------------|-----------|
| 2.18(8)   | 0.825(2) | 7.060(15)    | 4.013(11)    | 0.261(6)  |
| 3.18(8)   | 0.821(2) | 6.979(15)    | 3.960(11)    | 0.263(6)  |
| 3.98(6)   | 0.818(1) | 6.910(15)    | 3.914(14)    | 0.264(6)  |
| 4.59(4)   | 0.814(1) | 6.855(11)    | 3.874(13)    | 0.265(5)  |
| 5.44(2)   | 0.808(1) | 6.781(14)    | 3.823(7)     | 0.267(5)  |
| 6.21(2)   | 0.804(1) | 6.773(12)    | 3.811(11)    | 0.268(5)  |
| 6.68(3)   | 0.800(2) | 6.810(13)    | 3.810(8)     | 0.272(5)  |
| 7.32(7)   | 0.793(2) | 6.924(15)    | 3.857(13)    | 0.275(6)  |
| 8.05(6)   | 0.782(2) | 7.150(16)    | 3.931(9)     | 0.283(6)  |
| 8.96(11)  | 0.767(1) | 7.460(16)    | 4.053(11)    | 0.291(6)  |
| 9.86(10)  | 0.744(2) | 7.648(19)    | 4.127(15)    | 0.295(7)  |
| 10.74(9)  | 0.744(2) | 7.939(19)    | 4.253(11)    | 0.299(6)  |
| 11.27(14) | 0.739(2) | 8.082(18)    | 4.318(10)    | 0.300(6)  |
| 12.33(6)  | 0.734(2) | 8.196(19)    | 4.361(12)    | 0.302(6)  |
| 13.31(5)  | 0.730(2) | 8.282(19)    | 4.401(19)    | 0.303(7)  |
| 13.95(6)  | 0.727(2) | 8.357(23)    | 4.435(15)    | 0.304(7)  |
| 14.32(4)  | 0.726(2) | 8.419(29)    | 4.460(12)    | 0.305(8)  |
| 14.91(4)  | 0.724(2) | 8.483(25)    | 4.481(14)    | 0.306(7)  |
| 15.87(3)  | 0.723(2) | 8.559(26)    | 4.511(14)    | 0.308(8)  |
| 16.45(6)  | 0.721(2) | 8.645(26)    | 4.537(13)    | 0.310(7)  |
| 17.31(7)  | 0.719(2) | 8.710(26)    | 4.563(13)    | 0.311(7)  |
| 17.87(9)  | 0.717(3) | 8.774(35)    | 4.597(19)    | 0.311(10) |
| 18.49(7)  | 0.715(3) | 8.858(39)    | 4.631(21)    | 0.312(11) |
| 19.11(10) | 0.713(4) | 8.908(45)    | 4.657(23)    | 0.312(12) |
| 19.93(10) | 0.711(4) | 8.998(49)    | 4.687(25)    | 0.314(13) |
| 20.72(12) | 0.710(3) | 9.098(60)    | 4.719(28)    | 0.316(16) |
| 21.08(13) | 0.708(3) | 9.177(64)    | 4.754(26)    | 0.317(16) |
| 22.14(11) | 0.705(5) | 9.232(75)    | 4.779(36)    | 0.317(20) |
| 22.90(17) | 0.705(5) | 9.337(73)    | 4.827(37)    | 0.318(19) |
| 23.64(23) | 0.702(8) | 9.429(118)   | 4.854(59)    | 0.320(30) |

119 \*The numbers in parentheses indicate the uncertainties for the last digit. The initial thickness ( $L_0$ )  
120 is 0.84 mm, and the  $v_L$  and  $v_T$  at ambient conditions are 7.41 and 4.22 km/s, estimated from the  
121 previous measurement.<sup>3</sup>

**Table S5.** Sample length ( $L$ ),  $v_L$ ,  $v_T$ , and Poisson's ratio ( $\sigma$ ) of the 60AS glass.

| $P$ (GPa) | $L$ (mm) | $v_L$ (km/s) | $v_T$ (km/s) | $\sigma$ |
|-----------|----------|--------------|--------------|----------|
| 3.22(5)   | 0.719(3) | 7.496(18)    | 4.118(17)    | 0.284(7) |
| 4.73(6)   | 0.716(2) | 7.446(14)    | 4.072(12)    | 0.287(5) |
| 6.34(2)   | 0.719(3) | 7.363(19)    | 4.012(15)    | 0.289(7) |
| 7.10(5)   | 0.719(3) | 7.335(14)    | 3.992(12)    | 0.290(5) |
| 7.70(5)   | 0.706(2) | 7.306(13)    | 3.973(16)    | 0.290(6) |
| 8.42(2)   | 0.703(2) | 7.356(11)    | 3.999(15)    | 0.290(5) |
| 9.09(2)   | 0.696(2) | 7.496(12)    | 4.048(12)    | 0.294(5) |
| 9.17(7)   | 0.685(2) | 7.752(12)    | 4.164(13)    | 0.297(5) |
| 9.59(8)   | 0.671(2) | 8.115(18)    | 4.309(13)    | 0.304(6) |
| 11.29(5)  | 0.662(2) | 8.364(15)    | 4.423(13)    | 0.306(5) |
| 11.51(6)  | 0.657(2) | 8.504(13)    | 4.478(13)    | 0.308(4) |
| 12.71(8)  | 0.652(2) | 8.66(19)     | 4.532(14)    | 0.311(6) |
| 13.54(5)  | 0.648(2) | 8.754(18)    | 4.568(14)    | 0.313(6) |
| 14.29(2)  | 0.645(2) | 8.867(13)    | 4.624(16)    | 0.313(5) |
| 15.12(2)  | 0.642(2) | 8.946(13)    | 4.656(14)    | 0.314(4) |
| 16.16(5)  | 0.640(2) | 9.020(14)    | 4.688(15)    | 0.315(5) |
| 16.77(9)  | 0.638(2) | 9.095(14)    | 4.719(14)    | 0.316(4) |
| 17.55(11) | 0.635(2) | 9.173(12)    | 4.749(15)    | 0.317(4) |
| 18.57(14) | 0.634(2) | 9.279(13)    | 4.797(13)    | 0.318(4) |
| 19.34(11) | 0.632(2) | 9.333(15)    | 4.817(16)    | 0.318(5) |
| 19.86(7)  | 0.631(2) | 9.424(19)    | 4.858(18)    | 0.319(6) |
| 20.98(15) | 0.630(2) | 9.492(22)    | 4.888(20)    | 0.320(7) |
| 21.87(7)  | 0.629(2) | 9.556(26)    | 4.914(19)    | 0.320(7) |
| 22.72(21) | 0.627(2) | 9.622(29)    | 4.945(21)    | 0.321(8) |
| 23.32(15) | 0.627(2) | 9.707(28)    | 4.984(19)    | 0.321(7) |
| 24.33(20) | 0.624(2) | 9.709(27)    | 4.982(21)    | 0.321(7) |

123 \*The numbers in parentheses indicate the uncertainties for the last digit. The initial thickness ( $L_0$ )  
124 is 0.73 mm, and the  $v_L$  and  $v_T$  at ambient conditions are 7.71 and 4.30 km/s, estimated from the  
125 previous measurement.<sup>3</sup>

126

127

128

129 **Table S6.** Chemical compositions of each domain shown in Figure 1.

| mol%                           | 60AS    | 50AS     |          | 43AS     |          | 36AS    |          | 29AS    |         |
|--------------------------------|---------|----------|----------|----------|----------|---------|----------|---------|---------|
|                                |         | Si-rich  | Al-rich  | Si-rich  | Al-rich  | Si-rich | Al-rich  | Dark    | Bright  |
| SiO <sub>2</sub>               | 39.2(6) | 64.8(14) | 37.1(17) | 72.7(11) | 43.8(11) | 74.2(9) | 56.8(10) | 75.1(7) | 74.3(6) |
| Al <sub>2</sub> O <sub>3</sub> | 60.8(6) | 35.2(14) | 62.9(17) | 27.3(11) | 56.2(11) | 25.8(9) | 43.8(10) | 24.9(7) | 25.7(6) |

130 \*The numbers in parentheses indicate the uncertainties for the last digit.

131

132

133

134

135 **Table S7.** Pressure dependence of the five AS glasses obtained from linear fitting on the velocity–  
 136 pressure plots between 12–23 GPa.

|      | $dv_L/dP$  | $dv_T/dP$  |
|------|------------|------------|
|      | (km/s/GPa) |            |
| 29AS | 0.1279(13) | 0.0496(9)  |
| 36AS | 0.1299(25) | 0.0482(9)  |
| 43AS | 0.1366(33) | 0.0551(13) |
| 50AS | 0.1077(13) | 0.0429(7)  |
| 60AS | 0.0987(20) | 0.0416(9)  |

137

\*The numbers in parentheses indicate the uncertainties for the last digit.
